# Supplementary material for: Does cefiderocol heteroresistance explain the discrepancy between the APEKS-NP and CREDIBLE-CR clinical trial results?
Source: PubMed Central journal article supplement — Lancet Microbe. Author manuscript; Available in PMC 2022 Dec 12. (PMC9743357; doi:10.1016/s2666-5247(21)00271-8), 2021-10-28
Supplement: NIHMS1853756-supplement-Supplementary_Material.pdf [file NIHMS1853756-supplement-Supplementary_Material.pdf]

# THE LANCET Microbe

## Supplementary appendix

This appendix formed part of the original submission. We post it as supplied by the authors.

Supplement to: Choby JE, Ozturk T, Satola SW, Jacob JT, Weiss DS. Does cefiderocol heteroresistance explain the discrepancy between the APEKS-NP and CREDIBLE-CR clinical trial results?. *Lancet Microbe* 2021; published online Oct 28. [https://doi.org/10.1016/S2666-5247\(21\)00271-8](https://doi.org/10.1016/S2666-5247(21)00271-8).

## **METHODS**

### **Isolate information**

Unique patient isolates of carbapenem-susceptible *Acinetobacter* spp. (from 2018-2021), *Klebsiella* spp. (2019-2020), and *Pseudomonas aeruginosa* (2018-2021) from Georgia, USA were collected as part of the Emory Antibiotic Resistance Center's Investigational Clinical Microbiology Core repository (<https://www.cores.emory.edu/icmc/>).

### **Population analysis profile**

Population analysis profile (PAP) was performed as described previously<sup>1,2</sup>. A given clinical isolate was grown overnight from a single colony isolated from frozen stock in 1.5 mL iron-depleted cation-adjusted Mueller Hinton Broth (ID-CA-MHB) prepared according to accepted protocol<sup>3</sup> at 37°C with shaking for aeration. The culture was then serially diluted and plated on Mueller-Hinton agar containing 0, 2, 4, 8, 16, or 32 µg/mL cefiderocol (Hardy Diagnostics); 16 µg/mL is the CLSI breakpoint for all three species<sup>4</sup>. Colonies were enumerated after 24-48 h of growth at 37°C. An isolate was classified as resistant if the number of colonies that grew at the breakpoint concentration was at least 50% of those that grew on antibiotic free plates. If the isolate was not resistant, it was classified as heteroresistant if the number of colonies that grew at 2 or 4 times the breakpoint were at least 0.0001% (1 in 10<sup>6</sup>) of those that grew on antibiotic free plates. If the isolate was neither classified as resistant nor heteroresistant, it was classified as susceptible.

### **Cefiderocol treatment case reports**

An incomplete list of case reports in which cefiderocol was used for treatment of infections caused by carbapenem-resistant and/or multidrug resistant isolates is included as references 5 through 13.

## **ACKNOWLEDGEMENTS**

We would like to thank the US Centers for Disease Control and Prevention (CDC)'s Emerging Infections Program and the Multi-Site Gram-negative Surveillance Initiative, as well as the Emory Antibiotic Resistance Center's Investigational Clinical Microbiology Core and Michelle H. Davis, for providing isolates. This work was supported by the National Institutes of Health [AI141883, AI148661, and AI158080] and the Department of Veteran's Affairs [BX002788], and the National Institutes of Health's Office of the Director, Office of Research Infrastructure Programs, P51 OD011132. DSW is supported by a Burroughs Wellcome Fund Investigators in the Pathogenesis of Infectious Disease award and JEC is supported by the Cystic Fibrosis Foundation and National Institutes of Health [T32 DK108735]. The Multi-Site Gram-negative Surveillance Initiative is funded by the CDC.

**FIGURES AND TABLES**

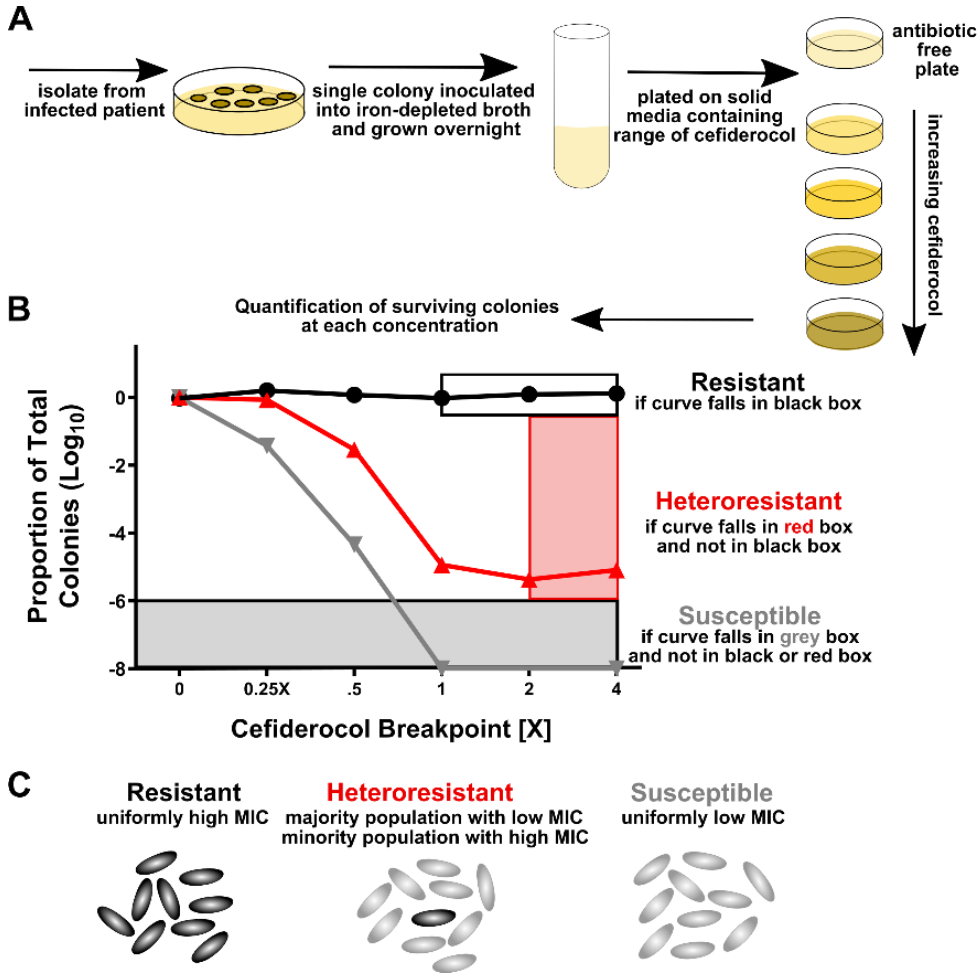

**Supplemental Figure 1. Overview of heteroresistance and population analysis profile.** (A) A clinical isolate is isolated and grown in liquid medium, and then serially diluted and grown on increasing concentration of cefiderocol. (B) The surviving colonies are enumerated and the isolate is classified as resistant if at least 50% of the total colonies grow at 1, 2 or 4X breakpoints. An isolate is considered susceptible if less than -6 logs (0.0001%) grow at 1, 2 and 4X. An isolate is considered heteroresistant if there is less than 50% survival at 1X breakpoint and greater than 0.0001% at 2 or 4X breakpoint. (C) A schematic depiction of the cells grown from a single colony of an isolate.

|                              |                                        | <i>Acinetobacter</i> | <i>Klebsiella</i> | <i>Pseudomonas</i> | Total        |
|------------------------------|----------------------------------------|----------------------|-------------------|--------------------|--------------|
| Hetero-resistance<br>GA, USA | Susceptible (S) <sup>A</sup>           | 11% [4/35]           | 0% [0/50]         | 5% [1/20]          | 5% [5/105]   |
|                              | Cephalosporin-resistant <sup>B</sup>   | 44% [8/18]           | 12% [5/41]        | 5% [1/19]          | 18% [14/78]  |
|                              | Carbapenem-resistant (CR) <sup>2</sup> | 59% [64/108]         | 30% [27/89]       | 9% [6/69]          | 36% [97/266] |
| All-cause mortality          | APEKS-NP <sup>14,C</sup>               | 22% [5/23]           | 10% [5/48]        | 8% [2/24]          | 13% [12/95]  |
|                              | CREDIBLE-CR <sup>15,C</sup>            | 49% [19/39]          | 21% [6/28]        | 18% [2/11]         | 35% [27/78]  |

<sup>A</sup>These isolates are susceptible to meropenem, cefepime, ceftazidime, and ceftriaxone by clinical antimicrobial susceptibility testing.

<sup>B</sup>These isolates are carbapenem (meropenem) susceptible but resistant to at least one of the extended spectrum cephalosporins cefepime, ceftazidime, and ceftriaxone by clinical antimicrobial susceptibility testing.

<sup>C</sup>APEKS-NP involved only pneumonia patients while CREDIBLE-CR enrolled patients with pneumonia, bloodstream infections or urinary tract infections.

**Table 1. The higher rate of all-cause mortality in the CREDIBLE-CR trial versus the APEKS-NP trial correlates with the increased frequency of ceftiderocol heteroresistance among carbapenem-resistant relative to carbapenem-susceptible Gram-negative pathogens.** Heteroresistance was determined by population analysis profile (PAP) to detect minority resistant subpopulations within an isolate. Isolates were classified as susceptible (S), cephalosporin-resistant and carbapenem-susceptible, or carbapenem resistant (CR) by conventional antimicrobial susceptibility testing. Ceftiderocol heteroresistance rates among CR isolates were previously reported<sup>2</sup>. All-cause mortality data are from APEKS-NP<sup>14</sup> or CREDIBLE-CR<sup>15</sup>.

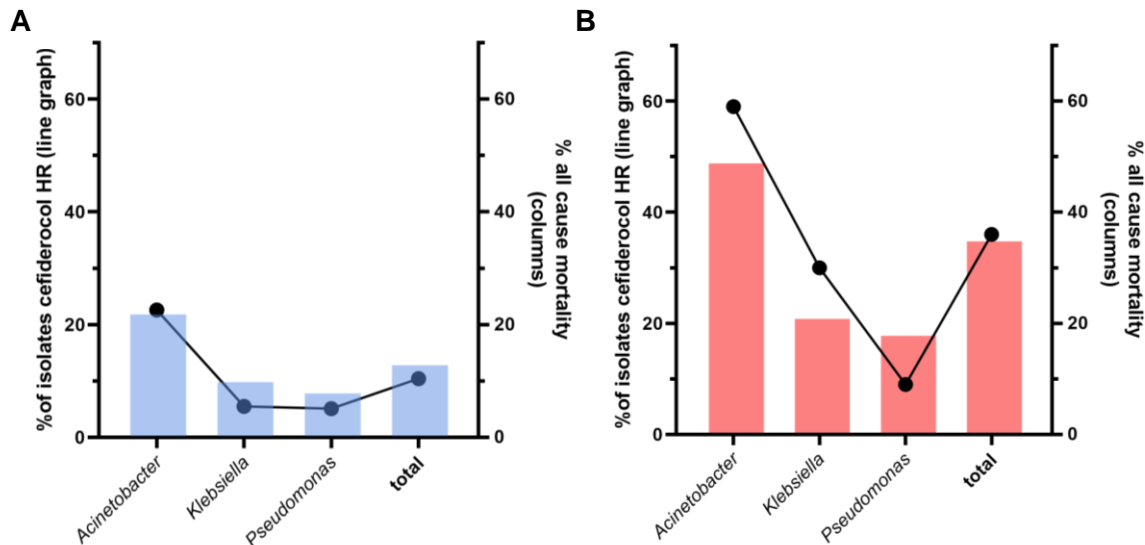

**Supplemental Figure 2. Graphical representation of the correlation between heteroresistance and all-cause mortality in the CREDIBLE-CR trial versus the APEKS-NP trial.** The left axis and line graphs show the heteroresistance rates and the right axis and columns show the all-cause mortality rate for (A) carbapenem-susceptible isolates and the APEKS-NP trial and (B) carbapenem-resistant isolates and the CREDIBLE-CR trial.

## References

1. Band VI, Hufnagel DA, Jaggavarapu S, et al. Antibiotic combinations that exploit heteroresistance to multiple drugs effectively control infection. *Nature Microbiology* 2019; **4**(10): 1627-35.
2. Choby JE, Ozturk T, Satola SW, Jacob JT, Weiss DS. Widespread cefiderocol heteroresistance in carbapenem-resistant Gram-negative pathogens. *Lancet Infect Dis* 2021; **21**(5): 597-8.
3. Hackel MA, Tsuji M, Yamano Y, Echols R, Karlowsky JA, Sahn DF. Reproducibility of broth microdilution MICs for the novel siderophore cephalosporin, cefiderocol, determined using iron-depleted cation-adjusted Mueller-Hinton broth. *Diagn Microbiol Infect Dis* 2019; **94**(4): 321-5.
4. CLSI. M100-ED31 2021 Performance Standards for Antimicrobial Susceptibility Testing 31st Ed. Wayne, PA: Clinical and Laboratory Standards Institute; 2021.
5. Bavaro DF, Belati A, Diella L, et al. Cefiderocol-Based Combination Therapy for "Difficult-to-Treat" Gram-Negative Severe Infections: Real-Life Case Series and Future Perspectives. *Antibiotics (Basel)* 2021; **10**(6).
6. Bodro M, Hernandez-Meneses M, Ambrosioni J, et al. Salvage Treatment with Cefiderocol Regimens in Two Intravascular Foreign Body Infections by MDR Gram-Negative Pathogens, Involving Non-Removable Devices. *Infect Dis Ther* 2021; **10**(1): 575-81.
7. Chavda A, Gilchrist M, Samarasinghe D. Education: A compassionate use of cefiderocol to treat osteomyelitis caused by an XDR *Pseudomonas aeruginosa*. *JAC Antimicrob Resist* 2021; **3**(Suppl 1): i18-i20.
8. Mabayoje DA, NicFhogartaigh C, Cherian BP, Tan MGM, Wareham DW. Compassionate use of cefiderocol for carbapenem-resistant *Acinetobacter baumannii* prosthetic joint infection. *JAC Antimicrob Resist* 2021; **3**(Suppl 1): i21-i4.
9. Konig C, Both A, Rohde H, et al. Cefiderocol in Critically Ill Patients with Multi-Drug Resistant Pathogens: Real-Life Data on Pharmacokinetics and Microbiological Surveillance. *Antibiotics (Basel)* 2021; **10**(6).
10. Alamarat ZI, Babic J, Tran TT, et al. Long-Term Compassionate Use of Cefiderocol To Treat Chronic Osteomyelitis Caused by Extensively Drug-Resistant *Pseudomonas aeruginosa* and Extended-Spectrum-beta-Lactamase-Producing *Klebsiella pneumoniae* in a Pediatric Patient. *Antimicrob Agents Chemother* 2020; **64**(4).
11. Dagher M, Ruffin F, Marshall S, et al. Case Report: Successful Rescue Therapy of Extensively Drug-Resistant *Acinetobacter baumannii* Osteomyelitis With Cefiderocol. *Open Forum Infect Dis* 2020; **7**(5): ofaa150.
12. Contreras DA, Fitzwater SP, Nanayakkara DD, et al. Coinfections of Two Strains of NDM-1- and OXA-232-Coproducing *Klebsiella pneumoniae* in a Kidney Transplant Patient. *Antimicrob Agents Chemother* 2020; **64**(4).
13. Trecarichi EM, Quirino A, Scaglione V, et al. Successful treatment with cefiderocol for compassionate use in a critically ill patient with XDR *Acinetobacter baumannii* and KPC-producing *Klebsiella pneumoniae*: a case report. *J Antimicrob Chemother* 2019; **74**(11): 3399-401.
14. Wunderink RG, Matsunaga Y, Ariyasu M, et al. Cefiderocol versus high-dose, extended-infusion meropenem for the treatment of Gram-negative nosocomial pneumonia (APEKS-NP): a randomised, double-blind, phase 3, non-inferiority trial. *Lancet Infect Dis* 2021; **21**(2): 213-25.
15. Bassetti M, Echols R, Matsunaga Y, et al. Efficacy and safety of cefiderocol or best available therapy for the treatment of serious infections caused by carbapenem-resistant Gram-negative bacteria (CREDIBLE-CR): a randomised, open-label, multicentre, pathogen-focused, descriptive, phase 3 trial. *Lancet Infect Dis* 2021; **21**(2): 226-40.
